# Supplementary material for: A Blood Meal Enhances Innexin mRNA Expression in the Midgut, Malpighian Tubules, and Ovaries of the Yellow Fever Mosquito Aedes aegypti
Source: MDPI journal article supplement (doi:10.3390/insects8040122), 2017-11-06
Supplement: s1 [file s1]

Communication

# A Blood Meal Enhances Innexin mRNA Expression in the Midgut, Malpighian Tubules, and Ovaries of the Yellow Fever Mosquito *Aedes aegypti*

Travis L. Calkins and Peter M. Piermarini \*

## Supplemental Tables and Figures:

**Supplemental Table S1.** qPCR primer pairs. Each set of innexin primers was determined to be specific through melt curve analysis and DNA sequencing of PCR products.

|             | qPCR Forward           | qPCR Reverse            |
|-------------|------------------------|-------------------------|
| <b>Inx1</b> | CACCGATAGTGCCGTATTCC   | CCGACATATTGTGTGGCAGT    |
| <b>Inx2</b> | GGAGATCCTATGGCACGAGT   | ACGGTAGCACACAGAGTCCA    |
| <b>Inx3</b> | TCGTTTCGGTTACTTCATCTGC | GCGATTCTCCTGATCCATGTC   |
| <b>Inx4</b> | TTCTGTTGGACACTGGGAAC   | CCATGTGCGTTCCTATTTTCG   |
| <b>Inx7</b> | TGGGTCCCGTTTGTGTTATT   | CCATACGAAGACCATCCACA    |
| <b>Inx8</b> | GACTGCGTTCACACGAAAGA   | GGGTACTIONCGCTACCGACTTT |
| <b>RPS7</b> | CTTGATGTGCGAGTGAACAC   | CATCTCCAACCTCCAGGATAGC  |

**Supplemental Table S2.** dsRNA template synthesis primers. Each primer set consists of an innexin specific region for amplification of the target gene from plasmid, and the T7 promoter sequence (TAATACGACTCACTATAGGGAGA).

|             | dsRNA Template Forward                         | dsRNA Template Reverse                          |
|-------------|------------------------------------------------|-------------------------------------------------|
| <b>Inx2</b> | TAATACGACTCACTATAGGGAGATT<br>GGCGTTTGAAAAGTGTG | TAATACGACTCACTATAGGGAGAATACTC<br>CCGGCTGAGCAATA |
| <b>eGFP</b> | TAATACGACTCACTATAGGGACGTAA<br>ACGGCCACAAGTT    | TAATACGACTCACTATAGGGTTGGGGTCT<br>TTGCTCAGG      |

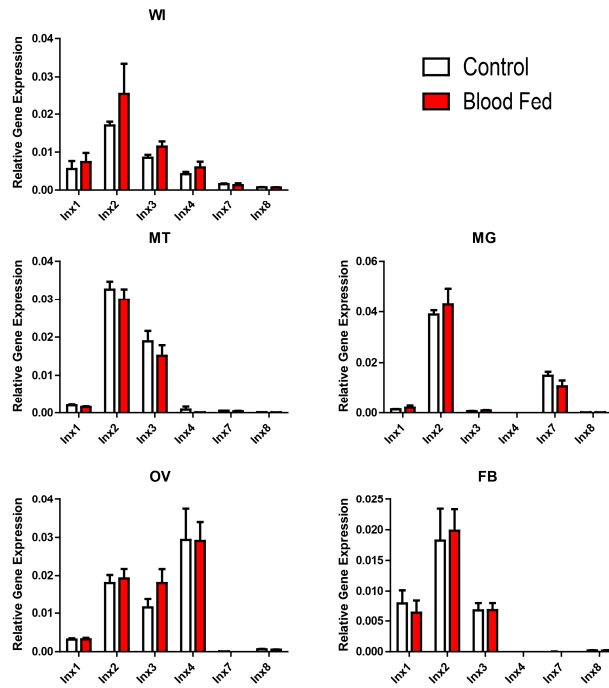

**Supplemental Figure S1.** Effects of a blood meal on innexin mRNA expression 3-h post-blood meal. White bars indicate non-blood fed control females and red bars indicate blood fed females. Bars indicate means  $\pm$  SEM,  $n = 5$ . Abbreviations are as in Figure 1. No differences were found in innexin expression between blood fed and non-blood fed controls as determined by a two-way ANOVA.

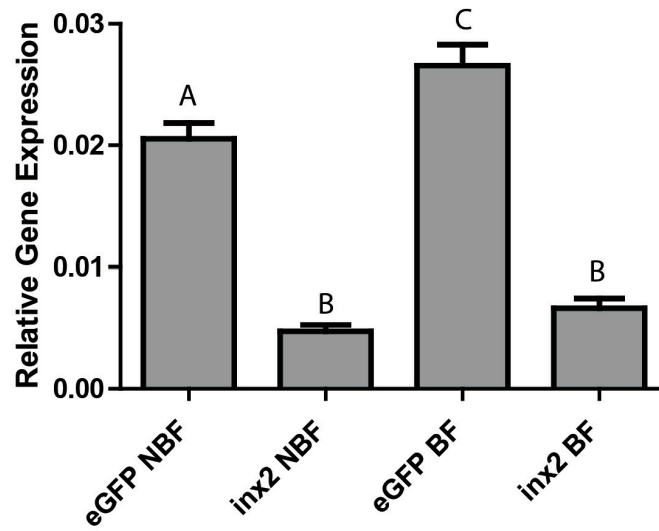

**Supplemental Figure S2.** Knockdown of *inx2* in blood fed and non-blood fed mosquitoes. Bars indicate means  $\pm$  SEM,  $n = 3$ . Letters represent statistical differences as determined by a two-way ANOVA. Knockdown of *inx2* is not significantly different between blood-fed and non-blood-fed mosquitoes.
